# Supplementary material for: Knowledge Distillation via Hierarchical Matching for Small Object Detection
Source: Springer Nature journal article supplement (doi:10.1007/s11390-024-4158-5), 2024-07-01
Supplement: 11390_2024_4158_MOESM1_ESM.pdf [file 11390_2024_4158_MOESM1_ESM.pdf]

Ma YC, Ma X, Hao TR *et al.* Knowledge distillation via hierarchical matching for small object detection. JOURNAL OF COMPUTER SCIENCE AND TECHNOLOGY 39(4): 798–810 July 2024. DOI: 10.1007/s11390-024-4158-5

# Knowledge Distillation via Hierarchical Matching for Small Object Detection

Yong-Chi Ma (马永驰), Xiao Ma (马啸), Tian-Ran Hao (郝天然),  
Li-Sha Cui (崔丽莎), Shao-Hui Jin (靳少辉), Pei Lyu (吕培)

# Research Objectives

## 1. Research Scope:

Address the domain of small object detection and its challenges in deep learning.

## 2. Research Inspirations:

Discuss the limitations of existing knowledge distillation methods for object detection, especially for small objects.

## 3. Research Purposes:

Introduce the proposed Hierarchical Matching Knowledge Distillation (HMKD) method designed to refine small object features effectively.

## 4. Significance:

Highlight the potential of the HMKD method to improve detection accuracy significantly without increasing computational demand, making it suitable for real-world applications.

# Research Method

## 1. Approach:

Utilize an encoder-decoder network for encapsulating low-resolution, high semantic information, and match it with high-resolution feature values. Employ an attention mechanism to enhance the precision of this matching process during knowledge distillation.

## 2. Evaluation:

Validate the effectiveness of the HMKD method through experiments on COCO2017 and VisDrone datasets, demonstrating significant improvements over traditional methods.

# Research Results

## 1. Major Findings:

Present quantitative results showing the HMKD method's effectiveness, citing improvements in mAP (mean Average Precision) on COCO2017 and performance metrics on VisDrone.

## 2. Value of Findings:

Discuss how the new findings enhance the detection of small objects, previously a significant challenge.

## 3. Limits:

Acknowledge any limitations observed in the study and the scope for scaling or adapting the methods for different architectures or larger datasets.

# Research Conclusions

## 1. Conclusions:

The HMKD framework significantly enhances the detection capabilities of small objects by focusing on hierarchical matching knowledge distillation. It successfully addresses the shortcomings of traditional distillation methods in handling small object features.

## 2. Future Work:

Plans to refine the approach to further minimize computational overhead and enhance real-time applicability, focusing on more efficient and scalable distillation techniques.
